# Supplementary material for: Neuropeptide signals cell non-autonomous mitochondrial unfolded protein response
Source: PubMed Central journal article supplement — Cell Res. 2016 Oct 21;26(11):1182–96. doi: 10.1038/cr.2016.118 (PMC5099867; doi:10.1038/cr.2016.118), 2016-10-21
Supplement: cr2016118x1.pdf [file cr2016118x1.pdf]

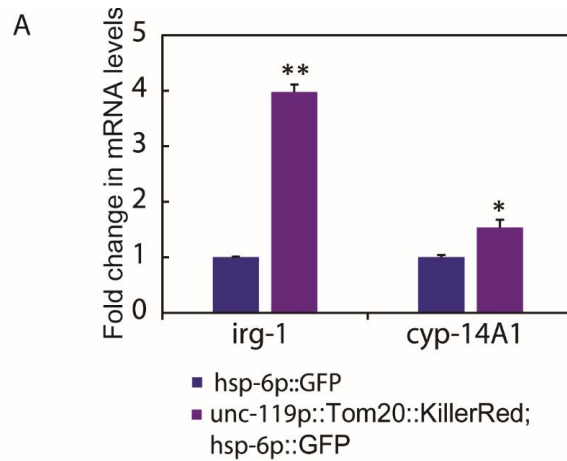

B

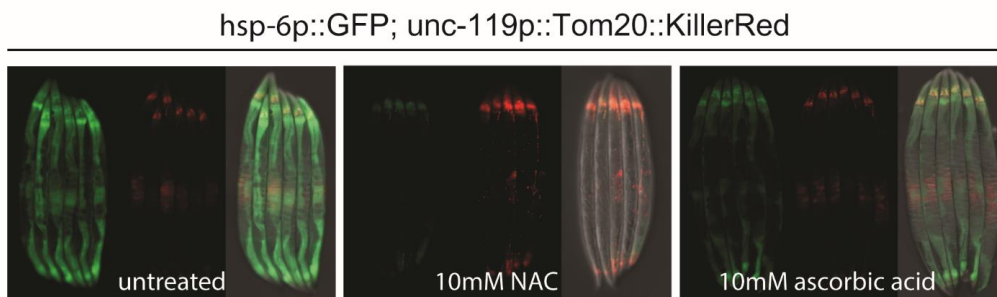

**Supplementary Figure 1** Overexpression of KillerRed in neurons induces cell-non-autonomous UPR<sup>mt</sup>. (A) qRT-PCR measures transcript levels of *irg-1* and *cyp-14A1* in *unc-119p::Tom20::KillerRed; hsp-6p::GFP* worms. Fold changes are compared with the control *hsp-6p::GFP* worms. A Student's t-test is used to assess significance: \* $p < 0.05$ , \*\* $p < 0.01$ . (B) Antioxidants treatment abolishes cell-non-autonomous UPR<sup>mt</sup> induced by neuronal expression of KillerRed. Representative images of adult worms are shown. Worms are treated as described in the Methods.
