# Supplementary material for: Neuropeptide signals cell non-autonomous mitochondrial unfolded protein response
Source: PubMed Central journal article supplement — Cell Res. 2016 Oct 21;26(11):1182–96. doi: 10.1038/cr.2016.118 (PMC5099867; doi:10.1038/cr.2016.118), 2016-10-21
Supplement: cr2016118x3.pdf [file cr2016118x3.pdf]

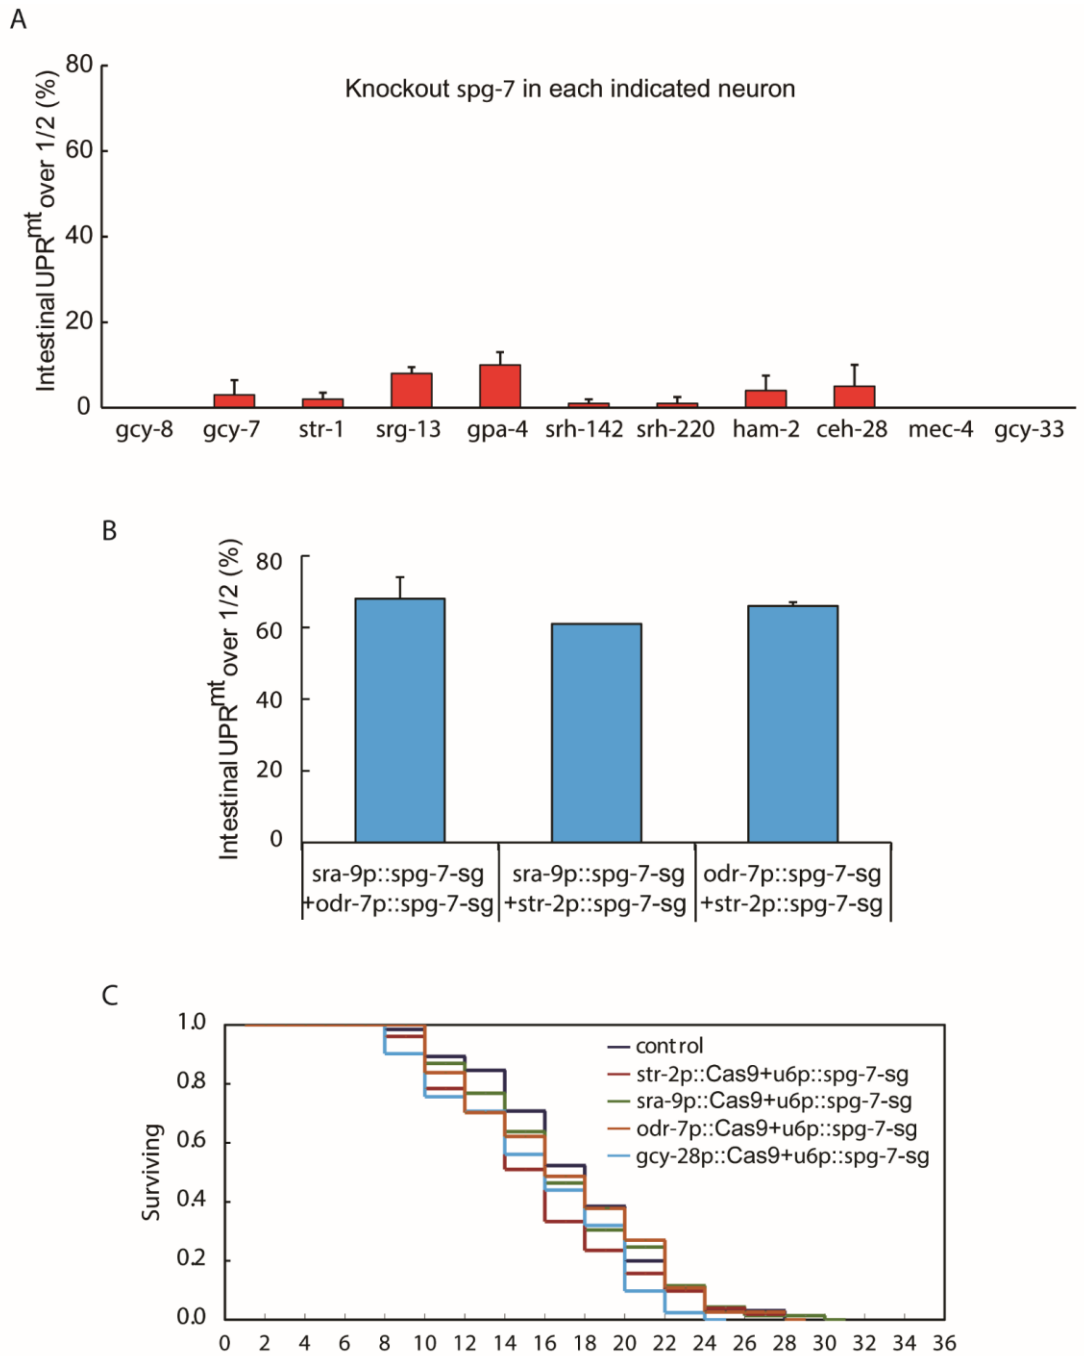

**Supplementary Figure 3** A neural sub-circuit is required for sensing and transducing mitochondrial stress. **(A)** Neurons not able to induce peripheral UPR<sup>mt</sup> when *spg-7* is deleted. Quantification of *hsp-6p::GFP* reporter induction in animals expressing Cas9-*spg-7-sg* under neural-specific promoters is shown.  $n \geq 29$ , error bars indicate mean  $\pm$ SE. **(B)** Peripheral induction of *hsp-6p::GFP* in animals containing Cas9-

*spg-7*-sg in two types of sensory neurons.  $n \geq 30$ , error bars indicate mean  $\pm$ SE. A

Student's t-test is used to assess significance. (C) Lifespan analysis of *hsp-6p::GFP*

control strain and transgenic lines containing *spg-7* knockout in each indicated

neurons.
