# Supplementary material for: Neuropeptide signals cell non-autonomous mitochondrial unfolded protein response
Source: PubMed Central journal article supplement — Cell Res. 2016 Oct 21;26(11):1182–96. doi: 10.1038/cr.2016.118 (PMC5099867; doi:10.1038/cr.2016.118), 2016-10-21
Supplement: cr2016118x7.pdf [file cr2016118x7.pdf]

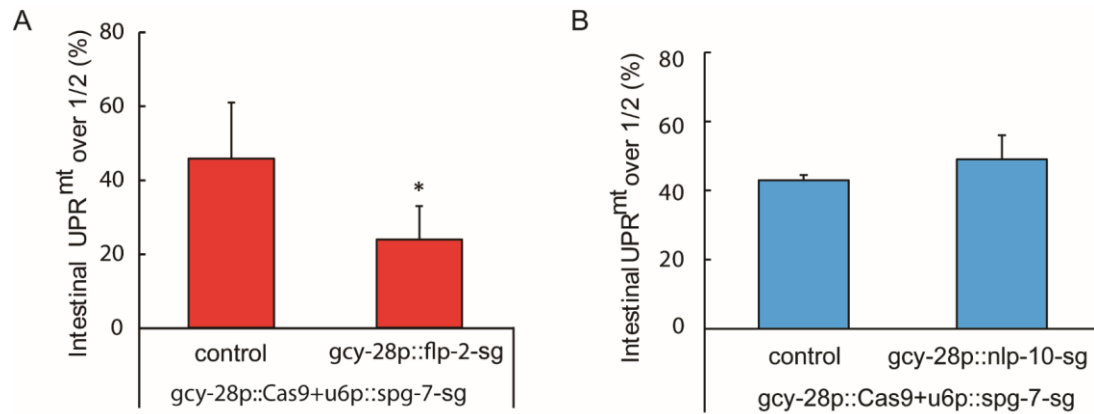

**Supplementary Figure 7** FLP-2 participates in cell-non-autonomous UPR<sup>mt</sup>

signaling. **(A-B)** Knockout of *flp-2* (A), but not control neuropeptide gene *nlp-10* (B),

in AIA interneurons alleviate cell-non-autonomous UPR<sup>mt</sup> in animals with *spg-7*

knockout in the same neuron.  $n \geq 57$ , error bars indicate mean  $\pm$  SE. A Student's t-

test is used to assess significance: \* $p < 0.05$ .
